1 **A potential role for GrgA in regulation of  $\sigma^{28}$ -dependent transcription in the obligate intracellular**  
2 **bacterial pathogen *Chlamydia trachomatis***

3

4

5 Malhar Desai<sup>1,2</sup>, Wurihan Wurihan<sup>1</sup>, Rong Di<sup>3</sup>, Joseph D. Fondell<sup>1,2</sup>, Bryce E. Nickels<sup>4</sup>, Xiaofeng Bao<sup>1,5\*</sup>,  
6 and Huizhou Fan<sup>1,2\*</sup>

7

8

9 <sup>1</sup>Department of Pharmacology, Robert Wood Johnson Medical School, Rutgers University, Piscataway,  
10 NJ 08854

11 <sup>2</sup>Graduate Program in Physiology and Integrative Biology, School of Graduate Studies, Rutgers  
12 University, NJ 08854

13 <sup>3</sup>Department of Plant Biology, School of Environmental and Biological Sciences, Rutgers University,  
14 New Brunswick, NJ 08901

15 <sup>4</sup>Waxman Institute of Microbiology, Rutgers University, Piscataway, NJ 08854

16 <sup>5</sup>Department of Pharmacology, School of Pharmacy, Nantong University, Nantong, China 226001

17

18

19 Running Head: GrgA regulates functions of  $\sigma^{28}$  and  $\sigma^{66}$  in *Chlamydia*

20

21

22 \*Address correspondence to Huizhou Fan ([huizhou.fan@rutgers.edu](mailto:huizhou.fan@rutgers.edu)) or Xiaofeng Bao

23 ([baoxi@ntu.edu.cn](mailto:baoxi@ntu.edu.cn))

24 **ABSTRACT**

25 The sexually transmitted obligate intracellular bacterial pathogen *Chlamydia trachomatis* has a  
26 unique developmental cycle consisting of two contrasting cellular forms. Whereas the primary  
27 *Chlamydia* sigma factor,  $\sigma^{66}$ , is involved in the expression of the majority of chlamydial genes throughout  
28 the developmental cycle, expression of several late genes requires the alternative sigma factor  $\sigma^{28}$ . In prior  
29 work we identified GrgA as a *Chlamydia*-specific transcription factor that activates  $\sigma^{66}$ -dependent  
30 transcription by binding DNA and interacting with a non-conserved region (NCR) of  $\sigma^{66}$ . Here, we extend  
31 these findings by showing GrgA can also activate  $\sigma^{28}$ -dependent transcription through direct interaction  
32 with  $\sigma^{28}$ . We measure the binding affinity of GrgA for both  $\sigma^{66}$  and  $\sigma^{28}$ , and we identify regions of GrgA  
33 important for  $\sigma^{28}$ -dependent transcription. Similar to results obtained with  $\sigma^{66}$ , we find that GrgA's  
34 interaction with  $\sigma^{28}$  involves a NCR located upstream of conserved region 2 of  $\sigma^{28}$ . Our findings suggest  
35 GrgA is an important regulator of both  $\sigma^{66}$ - and  $\sigma^{28}$ -dependent transcription in *C. trachomatis* and further  
36 highlight NCRs of bacterial RNA polymerase as targets for regulatory factors unique to particular  
37 organisms.

38

39 **IMPORTANCE**

40 *Chlamydia trachomatis* is the number one sexually transmitted bacterial pathogen  
41 worldwide. A substantial proportion of *C. trachomatis*-infected women develop infertility, pelvic  
42 inflammatory syndrome and other serious complications. *C. trachomatis* is also a leading  
43 infectious cause of blindness in under-developed countries. The pathogen has a unique  
44 developmental cycle, which is transcriptionally regulated. The discovery of an expanded role for  
45 the *Chlamydia*-specific transcription factor GrgA helps understand progression of the chlamydial  
46 developmental cycle.

47

## 48 INTRODUCTION

49 Each year, about 2.2 million cases of notifiable infections are reported to the Centers for Disease  
50 Control and Prevention (CDC). These infections are caused by nearly 100 different pathogens, but the  
51 majority (about 1.6 million, i.e., 60%) is due to the sexually transmitted pathogen *Chlamydia trachomatis*  
52 (1, 2). Still, CDC estimates that only 1 tenth of *C. trachomatis*-infected cases are reported because the  
53 infection is mostly asymptomatic (3). Nonetheless, without proper antibiotic treatment, the infection often  
54 leads to serious complications. In fact, *C. trachomatis* is the most common infectious cause of infertility  
55 and pelvic inflammatory syndrome in women. Infection in pregnant women may result in abortion or  
56 premature birth. Pathological changes in the fallopian tubes caused by *C. trachomatis* infection may lead  
57 to ectopic pregnancy, which causes severe bleeding and likely death if the ectopically embedded embryo  
58 is not detected and terminated early enough. Infants may develop *C. trachomatis* pneumonia following  
59 acquisition of the pathogen while passing the birth canal of an infected mother. Some *C. trachomatis*  
60 serotypes cause ocular infection, and are still the most common infectious microbes associated with  
61 blindness in underdeveloped countries (4, 5).

62 Like other chlamydiae, *C. trachomatis* is an obligate intracellular Gram-negative bacterium that exists  
63 in two cellular forms with contrasting properties (6). The small elementary body (EB) is infectious and  
64 capable of extracellular survival, but incapable of proliferation. Following binding to a cellular  
65 receptor(s), the EB enters a host cell membrane-derived vacuole through endocytosis (7). Within the  
66 vacuole termed inclusion, the EB differentiates into a larger cellular form termed reticulate body (RB)  
67 within several h. No longer infectious, the RB divides exponentially by binary fission until around 20 h  
68 when a significant portion of RBs re-differentiate back into EBs while some RBs continue proliferation  
69 (8). Progeny EBs along with residual RBs are released from infected cells following cell lysis.  
70 Alternatively, whole inclusions may be released from infected cells (9).

71 The 1 million bp *C. trachomatis* genome encodes fewer than 1000 genes (10). Microarray analyses  
72 demonstrated that the majority of these genes are transcribed starting a few hours post-inoculation  
73 throughout the remaining developmental cycle, whereas a small number of genes are transcribed

74 immediately following cell entry and another small set of genes are transcribed only at late stages (11,  
75 12). RNA-seq detected distinct sets of gene transcripts specifically enriched in either EBs or RBs (13),  
76 and purified EBs and RBs have been found to transcribe different sets of genes in axenic media (14).  
77 These findings suggest that the progression of the chlamydial developmental cycle is transcriptionally  
78 regulated.

79 Transcription is initiated following binding of the RNA polymerase (RNAP) to the gene promoter  
80 (15). The bacterial RNAP holoenzyme is comprised of the catalytic core enzyme and a  $\sigma$  factor, which is  
81 required for promoter recognition (16). Transcription of the vast majority of *C. trachomatis* genes  
82 involves  $\sigma^{66}$ , a homolog of  $\sigma^{70}$  that is often referred as the housekeeping  $\sigma$  factor in eubacteria (16).  
83 Expression of some (but not all) chlamydial late genes depends on  $\sigma^{28}$ . Several genes possess both a  $\sigma^{66}$   
84 promoter and a  $\sigma^{28}$  promoter (17).

85 GrgA (with the gene codes CT\_504 and CTL0766 for *C. trachomatis* serovar D and L2, respectively)  
86 is a *Chlamydia*-specific transcription activator (18). It was identified as a protein bound to the  $\sigma^{66}$ -  
87 dependent promoter of *defA*, which encodes peptide deformylase, an enzyme required for bacterial  
88 protein maturation and regulated protein degradation. In addition to *defA*, a midcycle gene, GrgA also  
89 stimulates transcription from another midcycle promoter (*ompA*), an early promoter (rRNA P1) and a late  
90 promoter (*hctA*), suggesting that GrgA functions as a general activator of  $\sigma^{66}$ -dependent genes (18). In  
91 this report, we demonstrate that GrgA also stimulates  $\sigma^{28}$ -dependent gene transcription *in vitro*. Thus, our  
92 findings suggest GrgA plays an expanded role in gene expression during the *C. trachomatis*  
93 developmental cycle as a regulator of both  $\sigma^{66}$ - and  $\sigma^{28}$ -dependent transcription.

94

95 **RESULTS**

96 ***GrgA physically interacts with  $\sigma^{28}$***

97 To assess whether GrgA potentially regulates expression of  $\sigma^{28}$ -dependent genes, we determined  
98 whether GrgA can interact with  $\sigma^{28}$ . We performed protein pull-down assays using differential epitope-  
99 tagging. The StrepTactin beads, which have affinity for the strep tag (19), precipitated NH- $\sigma^{28}$  (N-  
100 terminally poly-His-tagged *C. trachomatis*  $\sigma^{28}$ ) in a manner that was dependent on the N-terminally strep-  
101 tagged GrgA (NS-GrgA) (Fig. 1A). Reciprocally, NH-GrgA was pulled down in an NS- $\sigma^{28}$ -dependent  
102 manner (Fig. 1B). The results establish that GrgA can directly interact with  $\sigma^{28}$ .

103

104 ***GrgA has a lower affinity for  $\sigma^{28}$  than for  $\sigma^{66}$***

105 Next, we determined the binding affinities of GrgA for both  $\sigma^{28}$  and  $\sigma^{66}$ . We first compared the  
106 efficiencies of the  $\sigma$  factors in GrgA-binding by performing competitive pull-down assays. As expected,  
107 NS-GrgA efficiently pulled down NH- $\sigma^{28}$  and CH- $\sigma^{66}$  in separate reactions (Fig. S1). However, in the  
108 presence of equal molar concentrations of NH- $\sigma^{28}$  and CH- $\sigma^{66}$ , NS-GrgA pulled down only CH- $\sigma^{66}$  but  
109 not NH- $\sigma^{28}$  (Fig. S1), indicating that GrgA has a lower affinity for  $\sigma^{28}$  than  $\sigma^{66}$ .

110 We next quantitatively characterized GrgA-binding by  $\sigma^{28}$  and  $\sigma^{66}$  with biolayer interferometry using  
111 the BLItz system, which detects light wavelength shifts at the biosensor tip with an immobilized ligand  
112 following binding of an analyte in a real-time manner (20). Whereas representative BLItz recordings  
113 using NH-GrgA as a ligand, and CS- $\sigma^{66}$  and NS- $\sigma^{28}$  an analyte are shown in Fig. S2A, B), values of  
114 kinetic parameters are provided in Table 1. The CS- $\sigma^{66}$  analyte yielded a statistically highly significant  
115 25-fold higher  $k_a$  than the NS- $\sigma^{28}$  analyte, suggesting that CS- $\sigma^{66}$  binds NH-GrgA much faster than NS-  
116  $\sigma^{28}$ . CS- $\sigma^{66}$  also demonstrated a 3-fold statistically significant increase in  $k_d$ , suggestive of moderately  
117 higher dissociation from NH-GrgA. Compared to the NH-GrgA-CS- $\sigma^{66}$  interaction, the NH-GrgA-NS- $\sigma^{28}$   
118 interaction had a 32-fold higher  $K_D$ , indicating that GrgA has a lower overall affinity for  $\sigma^{28}$  than  $\sigma^{66}$ .

119 Reciprocal BLI using CH- $\sigma^{66}$  and NH- $\sigma^{28}$  as ligands and NS-GrgA as the analyte were performed to  
120 validate the difference in GrgA binding by the  $\sigma$  factors presented above (Fig. S2C, D and Table 1).  
121 Consistent with the trend in  $k_a$  value changes presented above, the NS-GrgA analyte also demonstrated a  
122 statistically significant higher  $k_a$  for CH- $\sigma^{66}$  than for NH- $\sigma^{28}$  although the difference is smaller (25-fold vs  
123 3.7 fold). Interestingly, the  $k_d$  values reveal that NS-GrgA also dissociates from CH- $\sigma^{66}$  6-fold slower than  
124 from NH- $\sigma^{28}$ . Compared to the CH- $\sigma^{66}$ -NS-GrgA interaction, the NH- $\sigma^{28}$ -NS-GrgA interaction had a 28-  
125 fold higher  $K_D$ , which is nearly identical to the 32-fold higher  $K_D$  detected for the NH-GrgA-NS- $\sigma^{28}$   
126 interaction vs the NH-GrgA-CS- $\sigma^{66}$  interaction. Thus, competitive pull-down assays and BLI establish  
127 that GrgA has a lower affinity for  $\sigma^{28}$  than for  $\sigma^{66}$ .

128

### 129 ***GrgA stimulates $\sigma^{28}$ -dependent transcription***

130 To determine whether GrgA can stimulate  $\sigma^{28}$ -dependent transcription, we performed *in vitro*  
131 transcription assays using pMT1212, a transcription reporter plasmid carrying the promoter of a gene  
132 encoding a histone-like protein (*hctB*) in *C. trachomatis* (21). Consistent with previous findings (21),  
133 transcription from the *hctB* promoter required the addition of NH- $\sigma^{28}$  to the *C. trachomatis* RNAP (Fig.  
134 2A). Interestingly, GrgA demonstrated a dose-dependent stimulatory effect on the transcription from the  
135 promoter (Fig. 2B, C). These data suggest that GrgA can increase the expression of genes with a  $\sigma^{28}$ -  
136 dependent promoter in addition to genes with a  $\sigma^{66}$ -dependent promoter.

137

### 138 ***Residues 138-165 in GrgA are required for binding both $\sigma^{28}$ and DNA, and for activating $\sigma^{28}$ -*** 139 ***dependent transcription***

140 A series of His-tagged GrgA deletion mutants (Fig. S3A, B) were tested for the effects on  
141 transcription from the *hctB* promoter (Fig. 3A). Noticeably, GrgA $\Delta$ 114-165 was completely defective in  
142 activating transcription from the  $\sigma^{28}$ -dependent promoter, whereas GrgA $\Delta$ 1-64 also demonstrated a

143 significant 50% loss of transcription activation activity (Fig. 3A). Deletion of other regions (65-113, 166-  
144 266 and 207-288) from GrgA had either no or minimal effects on the transcription activation (Fig. 3A).

145 Our previous studies have shown that deletion of residues 114-165 disables GrgA's DNA-binding,  
146 leading to loss of stimulation of transcription from  $\sigma^{66}$ -dependent promoters, whereas removal of residues  
147 1-64 disables  $\sigma^{66}$ -binding, also causing defect in activating  $\sigma^{66}$ -dependent transcription (18). Therefore,  
148 the results in Fig. 3A suggests that 1) DNA-binding is also required for  $\sigma^{28}$ -dependent transcription, and  
149 2) the N-terminal  $\sigma^{66}$ -interacting region may interact with  $\sigma^{28}$  as well. Surprisingly, pull-down assays  
150 demonstrated that GrgA $\Delta$ 114-165 is completely defective in  $\sigma^{28}$ -binding, whereas GrgA $\Delta$ 1-64 appeared  
151 to have only a slightly decreased  $\sigma^{28}$ -binding activity (Fig. 3B).

152 We performed a series of deletions within the 114-165 region to define the elements required for  
153 interacting with either DNA or  $\sigma^{28}$ . Since residues 114-138 are predicted to have coiled and stranded  
154 structures, whereas residues 139-158 are rich in positively charged lysine and aspartate, and are predicted  
155 to form a helix (Fig. S4), we expected GrgA $\Delta$ 114-137 but not GrgA $\Delta$ 138-165 to retain DNA-binding  
156 activity. EMSA confirmed this prediction (Fig. 3C). Interestingly, GrgA $\Delta$ 114-137 but not GrgA $\Delta$ 138-165  
157 also retained  $\sigma^{28}$ -binding activity as well (Fig. 3D). Not surprisingly, GrgA $\Delta$ 114-137 but not GrgA $\Delta$ 138-  
158 165 retained the capacity to activate  $\sigma^{28}$ -dependent transcription (Fig. 3E). Additional and extensive  
159 deletion mutagenesis and functional analyses for the region of residues 138-165 failed to 1) separate  
160 residues required for  $\sigma^{28}$ -binding from residues required for DNA-binding (Fig. S5 & S6), and 2) define a  
161 smaller region fully required for binding either  $\sigma^{28}$  or DNA (Fig. S5 & S6). These studies suggest that  $\sigma^{28}$   
162 and DNA bind to the same region in GrgA, and further confirm that  $\sigma^{28}$ - and DNA-binding are required  
163 for activation of  $\sigma^{28}$ -dependent transcription (Fig. S7).

164

### 165 ***Residues 1-64 in GrgA contribute to $\sigma^{28}$ -binding***

166 Transcription assays showed a 50% loss of activity in activating  $\sigma^{28}$ -dependent transcription in the  
167 GrgA $\Delta$ 1-64 mutant (Fig. 3A). We used the BLItz system (20) to confirm decreased  $\sigma^{28}$ -binding activity in

168  $\Delta 1-64$ . Representative BLItz recordings of binding experiments using full length NH-GrgA or deletion  
169 mutants as ligands and NS- $\sigma^{28}$  as analyte are shown in Fig. S8A-D, and kinetic parameters are provided in  
170 Table 2. Compared to the full length NH-GrgA, NS- $\sigma^{28}$  revealed a moderately slowed association with  
171 and a moderately accelerated dissociation from the NH-GrgA $\Delta 1-64$ , as indicated by a nearly 3-fold  
172 decrease in the  $k_a$  and a 2-fold increase in the  $k_d$  (Table 2). These changes resulted in a highly significant  
173 4.8-fold increase in the  $K_D$  value. On the other hand, NH-GrgA $\Delta 114-137$ , which retains the activity to  
174 activate  $\sigma^{28}$ -dependent transcription (Fig. 3E), demonstrated no changes in kinetic parameters for  
175 interaction with NS- $\sigma^{28}$  (Table 2). In contrast to NH-GrgA $\Delta 114-137$ , NH-GrgA $\Delta 138-165$  immediately  
176 and completely dissociated from NS- $\sigma^{28}$  upon wash (Fig. S8D), leading to a  $1.5 \times 10^6$  times higher  $k_d$  and  
177 a  $3.1 \times 10^6$  times higher  $K_D$  (Table 2), which are fully consistent with pull-down data (Fig. 3D).  
178 Furthermore, unlike NS- $\sigma^{28}$ , which retained a low affinity for NH-GrgA $\Delta 1-64$  (relative to full length NH-  
179 GrgA), CS- $\sigma^{66}$  quickly and completely dissociated from NH-GrgA $\Delta 1-64$  upon wash (Fig. S8E), which is  
180 consistent with pull-down data previously reported (18). Taken together, the BLItz data in Fig. S8 and  
181 Table 2 indicate that the decreased affinity with NS- $\sigma^{28}$  in NH-GrgA $\Delta 1-64$  is responsible for the partial  
182 loss of activity in activating  $\sigma^{28}$ -dependent transcription (Fig 3A).

183

#### 184 ***The N-terminus of $\sigma^{28}$ is most critical for binding GrgA***

185 We constructed NH- $\sigma^{28}$  variants with deletion of the N-terminal leader sequence,  $\sigma$  factor region 2, 3  
186 or 4 (unlike the housekeeping  $\sigma$  factor,  $\sigma^{28}$  does not contain region 1) (Fig. 4A). All deletion mutants (i.e.,  
187 NH- $\sigma^{28}\Delta NL$ , NH- $\sigma^{28}\Delta R2$ , NH- $\sigma^{28}\Delta R3$  and NH- $\sigma^{28}\Delta R4$ ) were expressed in *E. coli* (Fig. 4B). Noticeably,  
188 in pull-down assays, NS-GrgA completely failed to pull down the NH- $\sigma^{28}\Delta NL$  and NH- $\sigma^{28}\Delta R2$  mutants,  
189 and pulled down only small amounts of NH- $\sigma^{28}\Delta R3$  and NH- $\sigma^{28}\Delta R4$ , compared to full length NH- $\sigma^{28}$   
190 (Fig. 4C).

191 In BLItz assays, the rate of association with NH-GrgA varied greatly among the  $\sigma^{28}$  deletion mutants.  
192 Whereas NH- $\sigma^{28}\Delta NL$  had essentially the same  $k_a$  as full length NH- $\sigma^{28}$ , NH- $\sigma^{28}\Delta R2$  displayed a  
193 significant 2-fold reduction in  $k_a$ . In contrast, NH- $\sigma^{28}\Delta R3$  and NH- $\sigma^{28}\Delta R4$  showed a 3.5-fold increase and



194 a 50% increase in  $k_a$ , respectively (Table 3). All mutants demonstrated dramatic increases (10-383 fold) in  
195 the  $k_d$  (Table 3). Consequently, NH- $\sigma^{28}\Delta$ NL and NH- $\sigma^{28}\Delta$ R2 had 345- and 177-fold higher  $K_D$  value,  
196 respectively, whereas NH- $\sigma^{28}\Delta$ R3 and NH- $\sigma^{28}\Delta$ R4 both demonstrated 7 fold higher  $K_D$  values (Table 3).  
197 Representative graphs of BLItz recordings are shown in Fig. S9. Taken together, both the pull-down (Fig.  
198 4) and BLI data (Table 3) indicate that the N-terminus of  $\sigma^{28}$  (i.e., NL and R2) interacts with GrgA while  
199 R3 and R4 stabilize the GrgA- $\sigma^{28}$  binding.

200

## 201 **DISCUSSION**

202 Although GrgA was first identified as a transcription activator for  $\sigma^{66}$ -dependent genes (18), the  
203 present study has demonstrated that GrgA potentially stimulates expression of  $\sigma^{28}$ -dependent genes.  
204 Transcription of chlamydial genes is temporally controlled during the developmental cycle (11, 12, 17,  
205 22, 23). Whereas  $\sigma^{66}$  is involved in transcription of most *C. trachomatis* genes, some late promoters are  
206 recognized by  $\sigma^{28}$  (17). Microarray studies have shown that synthesis of the  $\sigma^{28}$  mRNA temporally falls  
207 behind the  $\sigma^{66}$  mRNA (11, 12). Thus, it would be safe to assume that GrgA primarily activates  $\sigma^{66}$ -  
208 dependent genes in earlier developmental stages.

209 Whether or not GrgA also regulates expression of  $\sigma^{28}$ -dependent genes during later developmental  
210 stages likely depends on the expression levels of GrgA,  $\sigma^{28}$  and  $\sigma^{66}$ . If GrgA is limited,  $\sigma^{28}$  would have to  
211 be present at significantly higher concentrations than  $\sigma^{66}$  to effectively compete for GrgA. However,  
212 quantitative whole proteomic mass spectrometry analyses detected higher levels of GrgA relative to  $\sigma^{66}$  in  
213 both EBs and RBs purified from the midcycle (24) whereas  $\sigma^{28}$  was undetected in either cellular form (24,  
214 25). Thus, GrgA could potentially stimulate transcription from  $\sigma^{28}$ -dependent promoters in addition to  $\sigma^{66}$ -  
215 dependent promoters regardless the molar ratio of the two  $\sigma$  factors. Accurate quantification of GrgA and  
216  $\sigma$  factors in different stages of the developmental cycle will help elucidate the role of GrgA in the  
217 expression of  $\sigma^{66}$ - and/or  $\sigma^{28}$ -dependent genes in different developmental stages.

218 We used both pull-down assays and BLI to analyze the interaction of GrgA with  $\sigma^{28}$  and  $\sigma^{66}$ . Clearly,  
219 owing to its quantitative nature, BLI offers higher sensitivities than protein pull-down assays in studying  
220 protein-protein interaction. This led to the confirmation that decreased affinity for  $\sigma^{28}$  in GrgA $\Delta$ 1-64,  
221 which was ambiguous in pull-down assays, is the most probable cause for a 50% loss of activity in  
222 activating  $\sigma^{28}$ -dependent transcription.

223 We have defined a middle region in GrgA (residues 138-165) as a  $\sigma^{28}$ - and DNA-binding domain  
224 (Fig. 3). Extensive deletion mutagenesis in this region failed to divide it into subdomains that bind either  
225  $\sigma^{28}$  or DNA but not both (Figs. S5 & S6). We speculate that multiple positively-charged residues (K138,  
226 K139, R142, R143, K144, K147, K150, K152, K154-156, R159-161 and/or K164) interact with

227 negatively charged DNA whereas multiple negatively-charged residues E141, E145, E149, D153 and/or  
228 E165) interact with  $\sigma^{28}$ .

229 GrgA has demonstrated similar but not identical properties in activating  $\sigma^{66}$ - and  $\sigma^{28}$ -dependent  
230 transcription. Apparently, sequence-nonspecific DNA-binding is required for activating both  $\sigma^{66}$ -  
231 dependent transcription (18) and  $\sigma^{28}$ -dependent transcription (Fig. 3A, E & Fig. S7). However, the N-  
232 terminal region (residues 1-64) of GrgA has a stronger role in  $\sigma^{66}$ -dependent transcription (18) than in  $\sigma^{28}$ -  
233 dependent transcription (Fig. 3A) because this region is absolutely required for GrgA to interact with  $\sigma^{66}$   
234 (18), but plays only a supportive role in binding  $\sigma^{28}$ , which was clearly evident only with BLI (Table 2)  
235 but appeared uncertain with pull-down assays (Fig. 3B).

236 Whereas the major GrgA structural determinants for binding  $\sigma^{28}$  and  $\sigma^{66}$  differ, there is similarity  
237 between the GrgA-binding regions in the two  $\sigma$  factors. The GrgA-binding sequence in  $\sigma^{66}$  is the last  
238 portion of the non-conserved region immediately upstream of the conserved region 2, whereas the GrgA-  
239 binding sequence in  $\sigma^{28}$  also involves the N-terminal non-conserved leader sequence (and the immediately  
240 downstream region 2). To the best of our knowledge, GrgA is the only transcription factor that targets  
241 non-conserved regions of  $\sigma$  factors (16).

242 In summary, we have demonstrated that the *Chlamydia*-specific GrgA can activate both  $\sigma^{66}$ -  
243 dependent transcription and  $\sigma^{28}$ -dependent transcription *in vitro*. Current knowledge suggests that GrgA  
244 primarily activates  $\sigma^{66}$ -dependent genes during earlier developmental stages. However, whether or not  
245 GrgA also regulates expression of  $\sigma^{28}$ -dependent genes during later developmental stages likely depends  
246 on the expression levels of GrgA,  $\sigma^{28}$  and  $\sigma^{66}$  because GrgA has a lower affinity for  $\sigma^{28}$  than  $\sigma^{66}$ . To date,  
247 GrgA remains the only transcription factor that targets non-conserved regions of  $\sigma$  factors (16).

248

## 249 MATERIALS AND METHODS

### 250 *Reagents*

251 All DNA primers were custom-synthesized at Sigma Aldrich. The QuikChange Site-Directed  
252 Mutagenesis Kit, BL21(DE3) ArcticExpress *E. coli* competent cells were purchased from Agilent  
253 Technologies. Q5 Site-Directed Mutagenesis Kit, and deoxynucleotides were purchased from New  
254 England BioLabs. Isopropyl  $\beta$ -D-1-thiogalactopyranoside (IPTG) was purchased from Gold  
255 Biotechnologies. TALON Metal Affinity Resin was purchased from Takara. The StrepTactin superflow  
256 high capacity resin and D-desthiobiotin were purchased from IBA Life Sciences. Coomassie Brilliant  
257 Blue G-250 Dye, mouse monoclonal anti-Histidine antibody (H1029), goat anti-mouse horseradish-  
258 peroxidase-conjugated antibody (A4416), and EZ-Link Sulfo-NHS-LC-Biotin were purchased from  
259 Sigma Aldrich. SuperSignal West Pico PLUS Chemiluminescent Substrate was purchased from  
260 ThermoFisher Scientific. Dip and Read Ni-NTA (NTA) biosensors were purchased from Pall ForteBio.  
261 The HNE Buffer contained 50 mM HEPES (pH 7.4), 300 mM NaCl, and 1 mM EDTA. The HNEG  
262 Buffer contained 50 mM HEPES (pH 7.4), 300 mM NaCl, 1 mM EDTA, and 6M Guanidine HCl. The  
263 TNE Buffer contained 25 mM Tris (pH 8.0), 150 mM NaCl, and 1 mM EDTA. The Protein Storage (PS)  
264 Buffer contained 25 mM Tris-HCl (pH 8.0), 150 mM NaCl, 0.1 mM EDTA, 10 mM MgCl<sub>2</sub>, 0.1 mM  
265 DTT, and 30% glycerol (w/v). The BLItz Buffer contained 25 mM Tris-HCl (pH 8.0), 150 mM NaCl, 0.1  
266 mM EDTA, 10 mM MgCl<sub>2</sub>, and 0.1 mM DTT.

267

### 268 *Vectors*

269 Plasmids for expressing His- or Strep-tagged GrgA,  $\sigma^{66}$ ,  $\sigma^{28}$ , and their mutants are listed in the Table  
270 S1. Sequences of primers used for constructing expression plasmids (GrgA deletion mutants, NS- $\sigma^{28}$ ) and  
271 a DNA fragment for EMSA assays are available upon request. Sequence authenticities of cloned genes  
272 and epitope tags in the final vectors were confirmed using Sanger's DNA sequencing service provided by  
273 GenScript Biotech Corporation.

274

275 ***Expression of recombinant proteins and preparation of cell extract for purification***

276 BL21(DE3) ArcticExpress *E. coli* cells transformed with a plasmid for expressing an epitope-tagged  
277 chlamydial protein (GrgA,  $\sigma^{28}$ ,  $\sigma^{66}$  or their mutant) (Table S1) were cultured in the presence of 1 mM  
278 IPTG overnight at 15 °C in a shaker. Cells were collected by centrifugation and resuspended in one of the  
279 following buffers: HNE buffer (for purification of native His-tagged proteins), HNEG buffer (for  
280 purification of denatured His-tagged proteins), or TNE buffer (for purification of native Strep-tagged  
281 proteins). The cells were disrupted using a French Press. The cell extract was subjected to high-speed  
282 (20,000g) centrifugation at 4 °C for 30 minutes. Supernatant was collected and used for protein  
283 purification.

284

285 ***Purification of Strep-tagged proteins***

286 Strep-tagged GrgA and  $\sigma$  factors were purified as previously described (19). The supernatant of  
287 centrifuged cell lysate was incubated with the StrepTactin superflow high capacity resin on a Nutator for  
288 1 h at 4 °C. The resin was packed onto a column and washed with 30 column volumes of the TNE Buffer,  
289 and then eluted with the TNE Buffer containing 2.5 mM D-desthiobiotin. The elution was collected in 10  
290 fractions. Protein in the fractions was examined following SDS-PAGE and Coomassie-Blue staining.  
291 Fractions with high purity and concentration were pooled and dialyzed overnight against the PS Buffer at  
292 4 °C, and then stored in aliquots at -80 °C.

293

294 ***Purification of His-tagged proteins***

295 The supernatant of centrifuged cell lysate was incubated with the TALON metal affinity resin on a  
296 Nutator for 1 hour at 4 °C. The resin incubated with non-denatured cell extract was packed onto a column,  
297 washed with 30 column volumes of HNE Buffer containing 1% NP-40, and eluted with the HNE Buffer  
298 containing 250 mM imidazole. The resin incubated with denatured cell extract was packed onto a column,  
299 washed with 30 column volumes of HNEG Buffer, and eluted with HNEG Buffer containing 250 mM

300 imidazole. Examination of protein purity, dialysis and storage were carried out in the same manner as for  
301 purified Strep-tagged proteins (18).

302

### 303 *In vitro transcription assay*

304 *In vitro* transcription of  $\sigma^{28}$ -dependent promoter was performed as previously described (18). The  
305 assay in a total volume of 30  $\mu$ l contained 200 ng supercoiled plasmid DNA, 50 mM potassium acetate,  
306 8.1mM magnesium acetate, 50 mM Tris acetate (pH8.0), 27 mM ammonium acetate, 1 mM DTT, 3.5%  
307 (wt/vol) poly-ethylene glycol (average molecular weight, 8,000), 330  $\mu$ M ATP, 330  $\mu$ M UTP, 1  $\mu$ M CTP,  
308 0.2  $\mu$ M [ $\alpha$ - $^{32}$ P]CTP (3,000 Ci/mmol), 100  $\mu$ M 3'-O-methyl-GTP, 20 units of RNasin, RNAP, and  
309 indicated amount of GrgA or GrgA mutant. The reactions using cRNAP and  $\sigma^{28}$  contained 1.0  $\mu$ L purified  
310 cRNAP and 30nM His-tagged  $\sigma^{28}$ , purified by procedures involving denaturing and refolding as described  
311 above. For reactions using eCore and  $\sigma^{28}$ , their concentrations were 5 nM and 30 nM, respectively. The  
312 reaction was allowed to pursue at 37 °C for 40 min and terminated by the addition of 70  $\mu$ L of 2.86 M  
313 ammonium acetate containing 4mg of glycogen. After ethanol precipitation,  $^{32}$ P-labeled RNA was  
314 resolved by 8M urea–6% polyacrylamide gel electrophoresis, and quantified with a Storm  
315 Phosphorimager and the ImageQuant software. Relative amounts of transcripts were presented with that  
316 of the control reaction set as 1 unit. Data shown in bar graphs represent averages  $\pm$  SDs from three or  
317 more independent experiments. Pairwise, two-tailed Student *t* tests were used to compare data.

318

### 319 *Electrophoresis mobility shift assay (EMSA)*

320 GrgA-DNA interaction was determined by EMSA as described previously (18).  $^{32}$ P-labeled DNA  
321 fragment containing the *C. trachomatis defA* promoter (26) was amplified using a  $^{32}$ P-labeled 5' primer  
322 and an unlabeled 3' primer (Table S2) and purified with a Qiagen column. The GrgA-DNA binding  
323 reaction was performed in a total volume of 10  $\mu$ L, containing 10 nM promoter fragment, an indicated  
324 amount of NH-GrgA, 1 mM potassium acetate, 8.1 mM magnesium acetate, 50 mM Tris acetate (pH 8.0),  
325 27 mM ammonium acetate, 1 mM DTT, and 3.5% (wt/vol) polyethylene glycol (average molecular

326 weight, 8,000). After mixing for 1 h at 4 °C, the binding mixture was resolved by 6% non-denaturing  
327 polyacrylamide gel. Free and GrgA-bound DNA fragments were visualized on a Storm Phosphorimager  
328 (Molecular Dynamics).

329

### 330 ***Pull-down assays***

331 20 µl of StrepTactin superflow high-capacity resin was washed twice with the HNE Buffer and  
332 incubated with 50 µl of Strep-tagged cell extract or purified protein on a Nutator at 4°C for 1 h. The resin  
333 was washed three times with HNE Buffer containing 1% NP-40, and then incubated with 5 µg of a  
334 purified His-tagged protein (or mutant) on a Nutator at 4 °C for 1 h. After 3 washes with the HNE Buffer  
335 containing 1% NP-40 and a final wash with PBS, the resin was eluted using SDS-PAGE sample buffer.  
336 All protein was resolved via SDS-PAGE and detected by either Coomassie blue staining or western  
337 blotting using a monoclonal mouse anti-His or a polyclonal mouse anti-GrgA primary antibody and HRP-  
338 conjugated goat anti-mouse secondary antibody.

339

### 340 ***Preparation of biotinylated protein***

341 Purified NH-GrgA was dialyzed against PBS to remove Tris and then incubated with 10 mM EZ-Link  
342 Sulfo-NHS-LC-Biotin for 2 hours at 4 °C. Excess biotin was removed via two-step dialysis, initially  
343 against PBS and subsequently against the PS buffer.

344

### 345 ***Bio-layer interferometry assay***

346 An NTA His or streptavidin biosensor was subjected to initial hydration in BLItz Buffer for 10  
347 minutes before being loaded onto the ForteBio BLItz machine and washed with BLItz Buffer for 30  
348 seconds to obtain a baseline reading. The His biosensor was then incubated with 4 µl of a His-tagged  
349 ligand for 240 seconds. The concentration of ligand ranged from 1-20 µM, which all saturated the His-  
350 binding sites on the biosensor. Alternatively, the streptavidin biosensor was incubated with 4 µl of a

351 biotinylated ligand (NH-GrgA, 10  $\mu$ M, which was sufficient to saturate the binding sites on the biosensor)  
352 for 240 seconds. After a brief wash with BLItz Buffer for 30 seconds to remove excess protein, the  
353 biosensor was incubated with 4  $\mu$ l of an analyte (purified Strep-tagged protein for the His biosensor or  
354 NH- $\sigma^{28}$  for the streptavidin biosensor) for 120 seconds to measure association of the ligand-analyte  
355 complex. Subsequently, the biosensor was washed with BLItz Buffer for 120 seconds to measure  
356 disassociation of the ligand-analyte complex. All BLItz recordings were subsequently fit to a 1:1 binding  
357 model using the BLItz Pro software (version 1.1.0.31), which generated the association rate constant ( $k_a$ ),  
358 disassociation rate constant ( $k_d$ ), and disassociation equilibrium constant ( $K_D$ ) for each interaction.  
359



360 **ACKNOWLEDGEMENTS**

361 We thank Ming Tan (University of California Irvine) for pMT1212. This research was supported by  
362 National Institutes of Health (Grant # AI122034 to HF, GM118059 to BEN), New Jersey Health  
363 Foundation (Grant # PC 20-18 to HF) and Natural Sciences Foundation of China (Grant # 31370209 and  
364 31400165 to XB).

365

366 **REFERENCES**

- 367 1. Adams DA, Thomas KR, Jajosky RA, Foster L, Sharp P, Onweh DH, Schley AW,  
368 Anderson WJ. 2016. Summary of Notifiable Infectious Diseases and Conditions - United  
369 States, 2014. *MMWR Morb Mortal Wkly Rep* 63:1-152.
- 370 2. Adams D, Fullerton K, Jajosky R, Sharp P, Onweh D, Schley A, Anderson W, Faulkner  
371 A, Kugeler K. 2015. Summary of Notifiable Infectious Diseases and Conditions - United  
372 States, 2013. *MMWR Morb Mortal Wkly Rep* 62:1-122.
- 373 3. CDC. 2013. Notifiable Diseases and Mortality Tables. *Morb Mortal Wkly Rep* 62:424-  
374 437.
- 375 4. Fan H. 2012. Blindness-causing trachomatous trichiasis biomarkers sighted. *Invest*  
376 *Ophthalmol Vis Sci* 53:2560.
- 377 5. Burton MJ, Mabey DCW. 2009. The global burden of trachoma: a review. *PLoS Negl*  
378 *Trop Dis* 3:e460.
- 379 6. Belland R, Ojcius DM, Byrne GI. 2004. *Chlamydia*. *Nat Rev Microbiol* 2:530-1.
- 380 7. Hybiske K, Stephens RS. 2007. Mechanisms of *Chlamydia trachomatis* entry into  
381 nonphagocytic cells. *Infect Immun* 75:3925-3934.
- 382 8. Lee JK, Enciso GA, Boassa D, Chander CN, Lou TH, Pairawan SS, Guo MC, Wan FYM,  
383 Ellisman MH, Sutterlin C, Tan M. 2018. Replication-dependent size reduction precedes  
384 differentiation in *Chlamydia trachomatis*. *Nat Commun* 9:45.
- 385 9. Hybiske K, Stephens RS. 2007. Mechanisms of host cell exit by the intracellular  
386 bacterium *Chlamydia*. *Proc Natl Acad Sci USA* 104:11430-11435.

- 387 10. Stephens RS, Kalman S, Lammel C, Fan J, Marathe R, Aravind L, Mitchell W, Olinger  
388 L, Tatusov RL, Zhao Q, Koonin EV, Davis RW. 1998. Genome sequence of an obligate  
389 intracellular pathogen of humans: *Chlamydia trachomatis*. *Science* 282:754-9.
- 390 11. Belland RJ, Zhong G, Crane DD, Hogan D, Sturdevant D, Sharma J, Beatty WL,  
391 Caldwell HD. 2003. Genomic transcriptional profiling of the developmental cycle of  
392 *Chlamydia trachomatis*. *Proc Natl Acad Sci USA* 100:8478-83.
- 393 12. Nicholson TL, Olinger L, Chong K, Schoolnik G, Stephens RS. 2003. Global stage-  
394 specific gene regulation during the developmental cycle of *Chlamydia trachomatis*. *J*  
395 *Bacteriol* 185:3179-89.
- 396 13. Albrecht M, Sharma CM, Reinhardt R, Vogel J, Rudel T. 2010. Deep sequencing-based  
397 discovery of the *Chlamydia trachomatis* transcriptome. *Nucleic acids research* 38:868-  
398 877.
- 399 14. Omsland A, Sager J, Nair V, Sturdevant DE, Hackstadt T. 2012. Developmental stage-  
400 specific metabolic and transcriptional activity of *Chlamydia trachomatis* in an axenic  
401 medium. *Proc Natl Acad Sci USA* 109:19781-5.
- 402 15. Ebright RH. 2000. RNA polymerase: structural similarities between bacterial RNA  
403 polymerase and eukaryotic RNA polymerase II. *J Mol Biol* 304:687-98.
- 404 16. Feklistov A, Sharon BD, Darst SA, Gross CA. 2014. Bacterial sigma factors: a historical,  
405 structural, and genomic perspective. *Annu Rev Microbiol* 68:357-76.
- 406 17. Tan M. 2012. Temporal gene regulation during the chlamydial development cycle, p 149-  
407 169. *In* Tan M, Bavoil PM (ed), *Intracellular pathogens I: Chlamydiales*. ASM Press,  
408 Washington, DC.

- 409 18. Bao X, Nickels BE, Fan H. 2012. *Chlamydia trachomatis* protein GrgA activates  
410 transcription by contacting the nonconserved region of  $\sigma^{66}$ . Proc Natl Acad Sci USA  
411 109:16870-16875.
- 412 19. Schmidt TG, Skerra A. 2007. The Strep-tag system for one-step purification and high-  
413 affinity detection or capturing of proteins. Nat Protoc 2:1528-35.
- 414 20. Abdiche Y, Malashock D, Pinkerton A, Pons J. 2008. Determining kinetics and affinities  
415 of protein interactions using a parallel real-time label-free biosensor, the Octet. Anal  
416 Biochem 377:209-217.
- 417 21. Yu HH, Tan M. 2003. Sigma28 RNA polymerase regulates hctB, a late developmental  
418 gene in *Chlamydia*. Mol Microbiol 50:577-84.
- 419 22. Fahr MJ, Douglas AL, Xia W, Hatch TP. 1995. Characterization of late gene promoters  
420 of *Chlamydia trachomatis*. J Bacteriol 177:4252-60.
- 421 23. Wichlan DG, Hatch TP. 1993. Identification of an early-stage gene of *Chlamydia psittaci*  
422 6BC. J Bacteriol 175:2936-42.
- 423 24. Skipp PJ, Hughes C, McKenna T, Edwards R, Langridge J, Thomson NR, Clarke IN.  
424 2016. Quantitative Proteomics of the Infectious and Replicative Forms of *Chlamydia*  
425 *trachomatis*. PLoS One 11:e0149011.
- 426 25. Saka HA, Thompson JW, Chen YS, Kumar Y, Dubois LG, Moseley MA, Valdivia RH.  
427 2011. Quantitative proteomics reveals metabolic and pathogenic properties of *Chlamydia*  
428 *trachomatis* developmental forms. Mol Microbiol 82:1185-203.
- 429 26. Bao X, Pachikara ND, Oey CB, Balakrishnan A, Westblade LF, Tan M, Chase T, Nickels  
430 BE, Fan H. 2011. Non-coding nucleotides and amino acids near the active site regulate

431 peptide deformylase expression and inhibitor susceptibility in *Chlamydia trachomatis*.

432 Microbiol 157:2569-2581.

433

434

**Table 1. GrgA binds  $\sigma^{66}$  with a higher affinity than  $\sigma^{28}$**

| Ligand            | Analyte           | n | $k_a$                       |           | $k_d$                          |           | $K_D$                          |           |
|-------------------|-------------------|---|-----------------------------|-----------|--------------------------------|-----------|--------------------------------|-----------|
|                   |                   |   | 1/Ms                        | % control | 1/s                            | % control | M                              | % control |
| NH-GrgA           | CS- $\sigma^{66}$ | 6 | $(1.9 \pm 1.3) \times 10^6$ | 100       | $(9.3 \pm 5.2) \times 10^{-3}$ | 100       | $(6.9 \pm 5.9) \times 10^{-9}$ | 100       |
| NH-GrgA           | NS- $\sigma^{28}$ | 8 | $(1.5 \pm 1.7) \times 10^4$ | 4.0       | $(2.8 \pm 0.8) \times 10^{-3}$ | 30        | $(2.2 \pm 1.1) \times 10^{-7}$ | 3188      |
|                   |                   |   | <i>p</i> = 0.001            |           | <i>p</i> = 0.001               |           | <i>p</i> < 0.001               |           |
| CH- $\sigma^{66}$ | NS-GrgA           | 4 | $(7.7 \pm 1.3) \times 10^5$ | 100       | $(8.9 \pm 0.6) \times 10^{-3}$ | 100       | $(1.2 \pm 0.1) \times 10^{-8}$ | 100       |
| NH- $\sigma^{28}$ | NS-GrgA           | 6 | $(2.1 \pm 0.9) \times 10^5$ | 27        | $(5.6 \pm 1.2) \times 10^{-2}$ | 629       | $(3.4 \pm 2.0) \times 10^{-7}$ | 2833      |
|                   |                   |   | <i>p</i> < 0.001            |           | <i>p</i> < 0.001               |           | <i>p</i> = 0.013               |           |

435

436 BLItz assays were performed with His biosensors using indicated ligand and analyte pairs. Representative  
 437 graphs of recordings are shown in Fig. S2. Values of kinetic parameters (averages  $\pm$  standard deviations)  
 438 were generated by the BLItz Pro software (20).  $k_a$  (association rate constant) is defined as the number of  
 439 complexes formed per s in a 1 molar solution of A and B.  $k_d$  (disassociation rate constant) is defined as  
 440 the number of complexes that decay per second.  $K_D$  (disassociation equilibrium constant), defined as the  
 441 concentration at which 50% of ligand binding sites are occupied by the analytes, is  $k_d$  divided by  $k_a$ . n,  
 442 number of experimental repeats. *p* values were calculated using 2-tailed Student's *t* tests. n, number of  
 443 experimental repeats. *p* values were calculated using 2-tailed Student's *t* tests.

444

445 **Table 2. Deletion of amino acids 1-64 from GrgA negatively affects  $\sigma^{28}$ -binding**

| Ligand                   | n | $k_a$                                           |              | $k_d$                                              |                   | $K_D$                                              |                   |
|--------------------------|---|-------------------------------------------------|--------------|----------------------------------------------------|-------------------|----------------------------------------------------|-------------------|
|                          |   | $1/Ms$                                          | %<br>control | 1/s                                                | % control         | M                                                  | % control         |
| NH-GrgA                  | 8 | $(1.5 \pm 1.7) \times 10^4$                     | 100          | $(2.8 \pm 0.8) \times 10^{-3}$                     | 100               | $(2.2 \pm 1.1) \times 10^{-7}$                     | 100               |
| NH-GrgA $\Delta$ 1-64    | 4 | $(5.6 \pm 2.8) \times 10^3$<br><i>p</i> = 0.037 | 37           | $(5.8 \pm 2.3) \times 10^{-3}$<br><i>p</i> = 0.009 | 200               | $(1.1 \pm 0.2) \times 10^{-6}$<br><i>p</i> < 0.001 | 479               |
| NH-GrgA $\Delta$ 114-137 | 4 | $(1.5 \pm 0.4) \times 10^4$<br><i>p</i> = 0.947 | 98           | $(3.5 \pm 0.5) \times 10^{-3}$<br><i>p</i> = 0.128 | 124               | $(2.5 \pm 0.3) \times 10^{-7}$<br><i>p</i> = 0.658 | 112               |
| NH-GrgA $\Delta$ 138-165 | 2 | $(5.6 \pm 0.1) \times 10^3$<br><i>p</i> = 0.125 | 37           | $(4.1 \pm 0.3) \times 10^2$<br><i>p</i> = 0.002    | $1.5 \times 10^8$ | $(6.9 \pm 4.5) \times 10^{-2}$<br><i>p</i> < 0.001 | $3.1 \times 10^8$ |

446  
 447 Indicated His-tagged proteins were immobilized on His biosensors as ligands for the NS- $\sigma^{28}$  analyte in  
 448 BLItz assays. Representative graphs of BLItz recordings are shown in Fig. S8. See Table 1 for  
 449 information regarding kinetic parameters and statistics.

450

451 **Table 3. The N-terminal leading sequence and region 2 of  $\sigma^{28}$  are required for GrgA binding**

| Analyte                      | n | $k_a$                                           |              | $k_d$                                              |              | $K_D$                                              |              |
|------------------------------|---|-------------------------------------------------|--------------|----------------------------------------------------|--------------|----------------------------------------------------|--------------|
|                              |   | 1/Ms                                            | %<br>control | 1/s                                                | %<br>control | M                                                  | %<br>control |
| NH- $\sigma^{28}$            | 3 | $(2.2 \pm 0.4) \times 10^4$                     | 100          | $(4.7 \pm 0.1) \times 10^{-3}$                     | 100          | $(2.2 \pm 0.3) \times 10^{-7}$                     | 100          |
| NH- $\sigma^{28}\Delta 1-13$ | 3 | $(2.4 \pm 0.4) \times 10^4$<br><i>p</i> = 0.649 | 109          | $(1.8 \pm 0.2) \times 10^0$<br><i>p</i> < 0.001    | 38297        | $(7.6 \pm 0.5) \times 10^{-5}$<br><i>p</i> < 0.001 | 34545        |
| NH- $\sigma^{28}\Delta R2$   | 3 | $(1.3 \pm 0.4) \times 10^4$<br><i>p</i> = 0.044 | 59           | $(5.3 \pm 0.3) \times 10^{-1}$<br><i>p</i> = 0.036 | 11276        | $(3.9 \pm 1.1) \times 10^{-5}$<br><i>p</i> = 0.003 | 17727        |
| NH- $\sigma^{28}\Delta R3$   | 3 | $(8.0 \pm 1.6) \times 10^4$<br><i>p</i> = 0.004 | 363          | $(1.2 \pm 0.2) \times 10^{-1}$<br><i>p</i> < 0.001 | 2553         | $(1.5 \pm 0.2) \times 10^{-6}$<br><i>p</i> < 0.001 | 714          |
| NH- $\sigma^{28}\Delta R4$   | 3 | $(3.3 \pm 0.5) \times 10^4$<br><i>p</i> = 0.038 | 150          | $(4.9 \pm 0.3) \times 10^{-2}$<br><i>p</i> = 0.004 | 1043         | $(1.5 \pm 0.6) \times 10^{-6}$<br><i>p</i> = 0.018 | 714          |

452

453 Biotinylated NH-GrgA was immobilized on streptavidin biosensors as the ligand for indicated analytes in  
 454 BLItz assays. Representative graphs of recordings are shown in Fig. S9. See Table 1 for information  
 455 regarding kinetic parameters and statistics.

456



457 **FIGURE LEGENDS**

458

459 **Fig. 1. GrgA physically interacts with  $\sigma^{28}$ .** (A) Pull-down of NH- $\sigma^{28}$  by StrepTactin bead-immobilized  
460 NS-GrgA. Shown is a western blot detecting NH- $\sigma^{28}$ . (B) Pull-down of NH-GrgA by StrepTactin bead-  
461 immobilized NS- $\sigma^{28}$ . Shown is a western blot detecting NH-GrgA.

462

463 **Fig. 2. GrgA stimulates  $\sigma^{28}$ -dependent transcription using *C. trachomatis* RNAP.** (A) Transcription  
464 from the *C. trachomatis* *hctB* promoter in the pMT1212 report plasmid is dependent on the addition of  
465 NH- $\sigma^{28}$  to the chlamydial RNAP. (B) Gel image showing dose-dependent stimulation of transcription  
466 from the *hctB* promoter by GrgA. (C) Averages and SDs for three independent measurements are shown.

467

468 **Fig. 3. Residues 138-165 in GrgA are required for binding both  $\sigma^{28}$  and DNA, and for activating  $\sigma^{28}$ -**  
469 **dependent transcription.** (A) Efficient stimulation of transcription from the *hctB* promoter requires the  
470 N-terminal residues 1-64 and the middle region (114-165). 1  $\mu$ M full length GrgA (FL) or indicated  
471 deletion mutant was used per assay. *p1* is the *p* value between basal transcription activity (without GrgA)  
472 and activity with GrgA (FL or mutant); *p2* is the *p* value between FL and the deletion mutant (paired *t*  
473 tests of three independent experiments); na, not applicable. (B) Pull-down of NH-GrgA full length (FL)  
474 and  $\Delta$ 1-64 but not  $\Delta$  114-165 by StrepTactin bead-immobilized NS- $\sigma^{28}$ . GrgA and deletion mutants were  
475 detected by western blotting using a mouse anti-GrgA antibody because the anti-His used in (A & B) does  
476 not recognize  $\Delta$ 1-64 (18) . (C)  $\Delta$ 138-165 but not  $\Delta$ 114-137 is defective in DNA-binding like  $\Delta$ 114-165.  
477 Electrophoresis mobility shift assays (EMSA) were performed using a radiolabeled DNA fragment  
478 carrying sequences extending from position -144 to +52 of the *defA* gene (18) in the presence of the  
479 indicated concentrations of wild-type GrgA or the indicated GrgA mutant. (D)  $\Delta$ 138-165 but not  $\Delta$ 114-  
480 137 is defective in  $\sigma^{28}$ -binding. Protein pull-down and detection were performed as described in B, with  
481 the exception of detection via anti-His. (E)  $\Delta$ 138-165 but not NH-GrgA $\Delta$ 114-137 is fully defective in

482 activating transcription from the *hctB* promoter. See Fig. 2D legend for experimental and statistical  
483 information.

484 **Fig. 4. The N-terminal lead sequence and region 2 of  $\sigma^{28}$  are required for interaction with GrgA.** (A)  
485 Schematic of  $\sigma^{28}$  and mutants lacking the indicated regions. (B) Western blot showing expression of  
486 purified NH- $\sigma^{28}$  and mutants. (C) Precipitation of NH- $\sigma^{28}$  and mutants by StrepTactin-immobilized NS-  
487 GrgA. Shown is a western blot detecting NH- $\sigma^{28}$  or mutant. All proteins were resolved via SDS-PAGE  
488 and detected using an anti-His antibody.

489

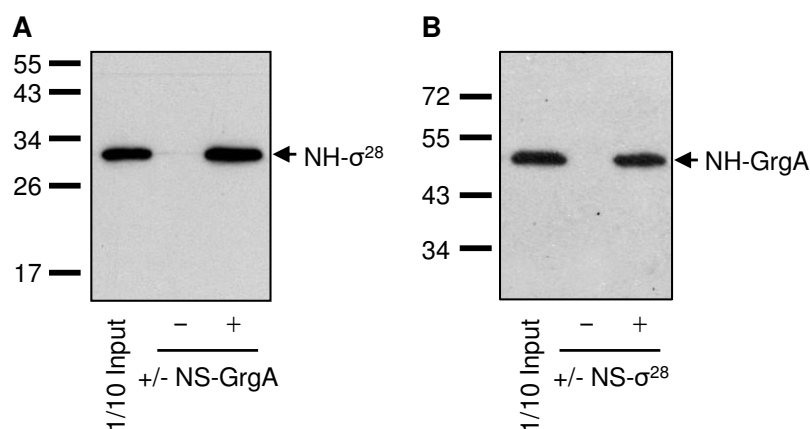

**Fig. 1. GrgA physically interacts with  $\sigma^{28}$ .** (A) Pull-down of NH- $\sigma^{28}$  by StrepTactin bead-immobilized NS-GrgA. Shown is a western blot detecting NH- $\sigma^{28}$  using an anti-His antibody. (B) Pull-down of NH-GrgA by StrepTactin bead-immobilized NS- $\sigma^{28}$ . Shown is a western blot detecting NH-GrgA using the anti-His antibody.

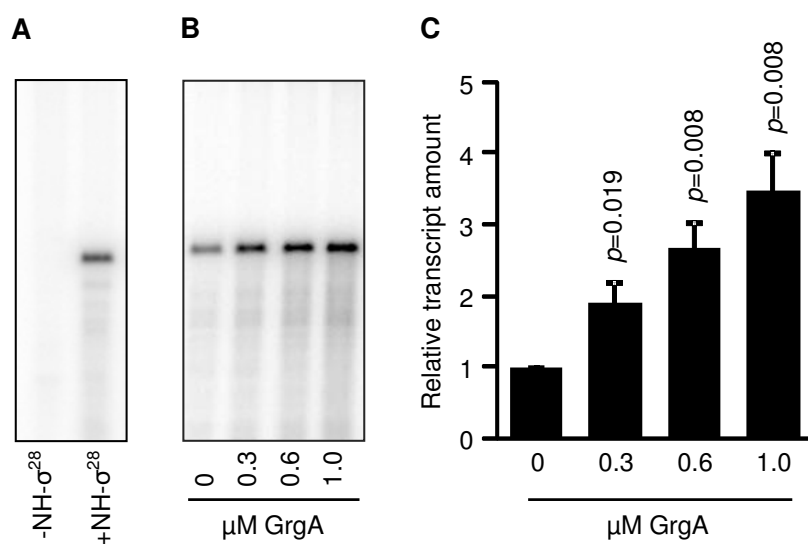

**Fig. 2. GrgA stimulates  $\sigma^{28}$ -dependent transcription using *C. trachomatis* RNAP.** (A) Transcription from the *C. trachomatis* *hctB* promoter in the pMT1212 report plasmid is dependent on the addition of NH- $\sigma^{28}$  to the chlamydial RNAP. (B) Gel image showing dose-dependent stimulation of transcription from the *hctB* promoter by GrgA. (C) Averages and SDs for three independent measurements are shown.

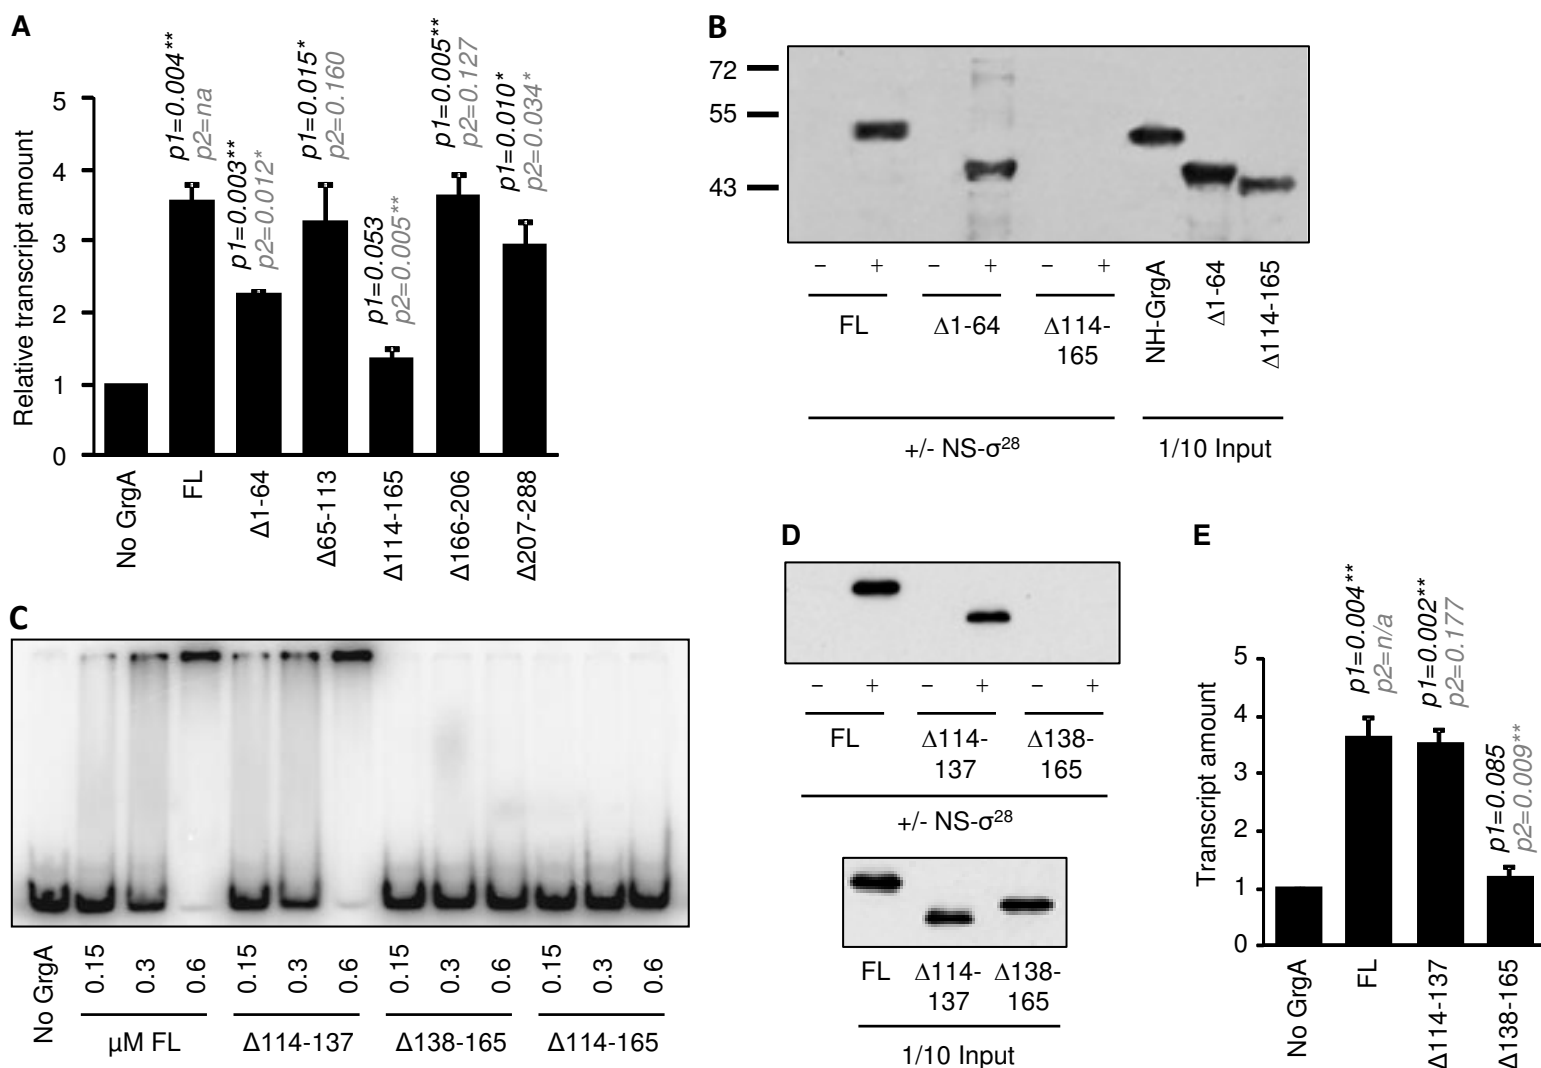

**Fig. 3. Residues 138-165 in GrgA are required for binding both  $\sigma^{28}$  and DNA, and for activating  $\sigma^{28}$ -dependent transcription.** (A) Efficient stimulation of transcription from the *hctB* promoter requires the N-terminal residues 1-64 and the middle region (114-165). 1  $\mu$ M full length GrgA (FL) or indicated deletion mutant was used per assay.  $p1$  is the  $p$  value between basal transcription activity (without GrgA) and activity with GrgA (FL or mutant);  $p2$  is the  $p$  value between FL and the deletion mutant (paired  $t$  tests of three independent experiments); na, not applicable. (B) Pull-down of NH-GrgA full length (FL) and  $\Delta$ 1-64 but not  $\Delta$  114-165 by StrepTactin bead-immobilized NS- $\sigma^{28}$ . GrgA and deletion mutants were detected by western blotting using a mouse anti-GrgA antibody because the anti-His used in (A & B) does not recognize  $\Delta$ 1-64 (18). (C)  $\Delta$ 138-165 but not  $\Delta$ 114-137 is defective in DNA-binding like  $\Delta$ 114-165. Electrophoresis mobility shift assays (EMSA) were performed using a radiolabeled DNA fragment carrying sequences extending from position -144 to +52 of the *defA* gene (18) in the presence of the indicated concentrations of wild-type GrgA or the indicated GrgA mutant. (D)  $\Delta$ 138-165 but not  $\Delta$ 114-137 is defective in  $\sigma^{28}$ -binding. Protein pull-down and detection were performed as described in B, with the exception of detection via anti-His. (E)  $\Delta$ 138-165 but not NH-GrgA $\Delta$ 114-137 is fully defective in activating transcription from the *hctB* promoter. See Fig. 1D legend for experimental and statistical information.

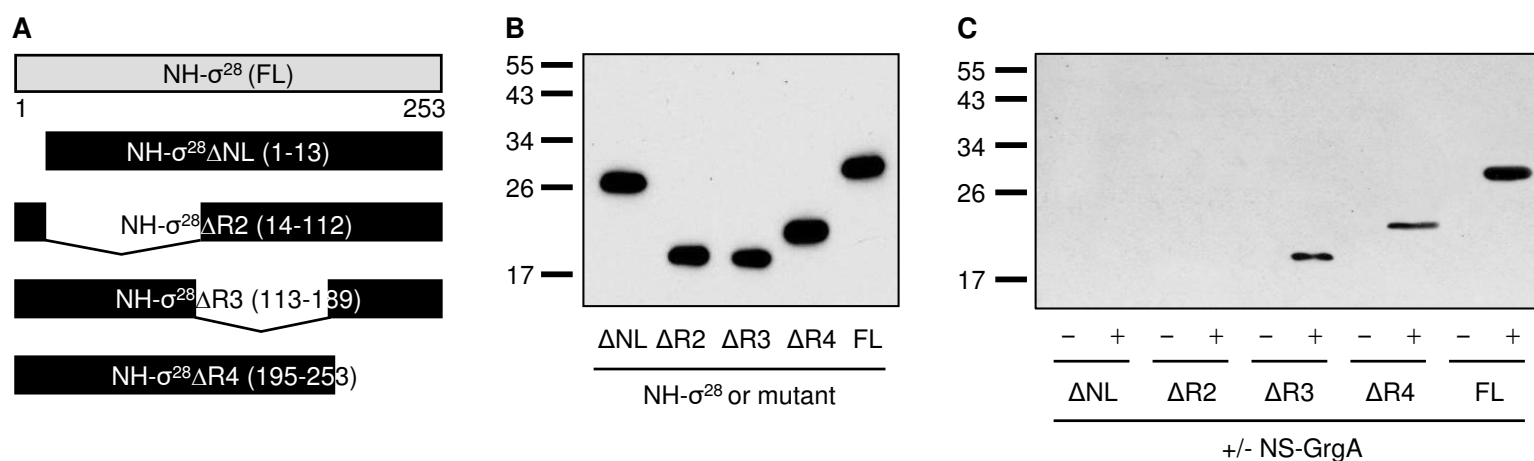

**Fig. 4. The N-terminal lead sequence and region 2 of  $\sigma^{28}$  are required for interaction with GrgA.** (A) Schematic of  $\sigma^{28}$  and mutants lacking the indicated regions. (B) Western blot showing expression of purified NH- $\sigma^{28}$  and mutants. (C) Precipitation of NH- $\sigma^{28}$  and mutants by StrepTactin-immobilized NS-GrgA. Shown is a western blot detecting NH- $\sigma^{28}$  or mutant. All proteins were resolved via SDS-PAGE and detected using an anti-His antibody.
